# Supplementary material
Source: ML conference proceedings conference paper supplement (https://aclanthology.org/2025.loreslm-1.30)

Accuracy versus complexity of intervening phrase

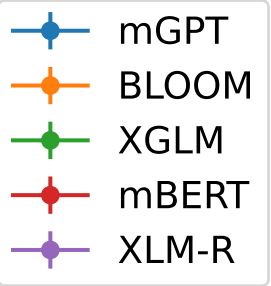

Hindi (ergative-absolutive)

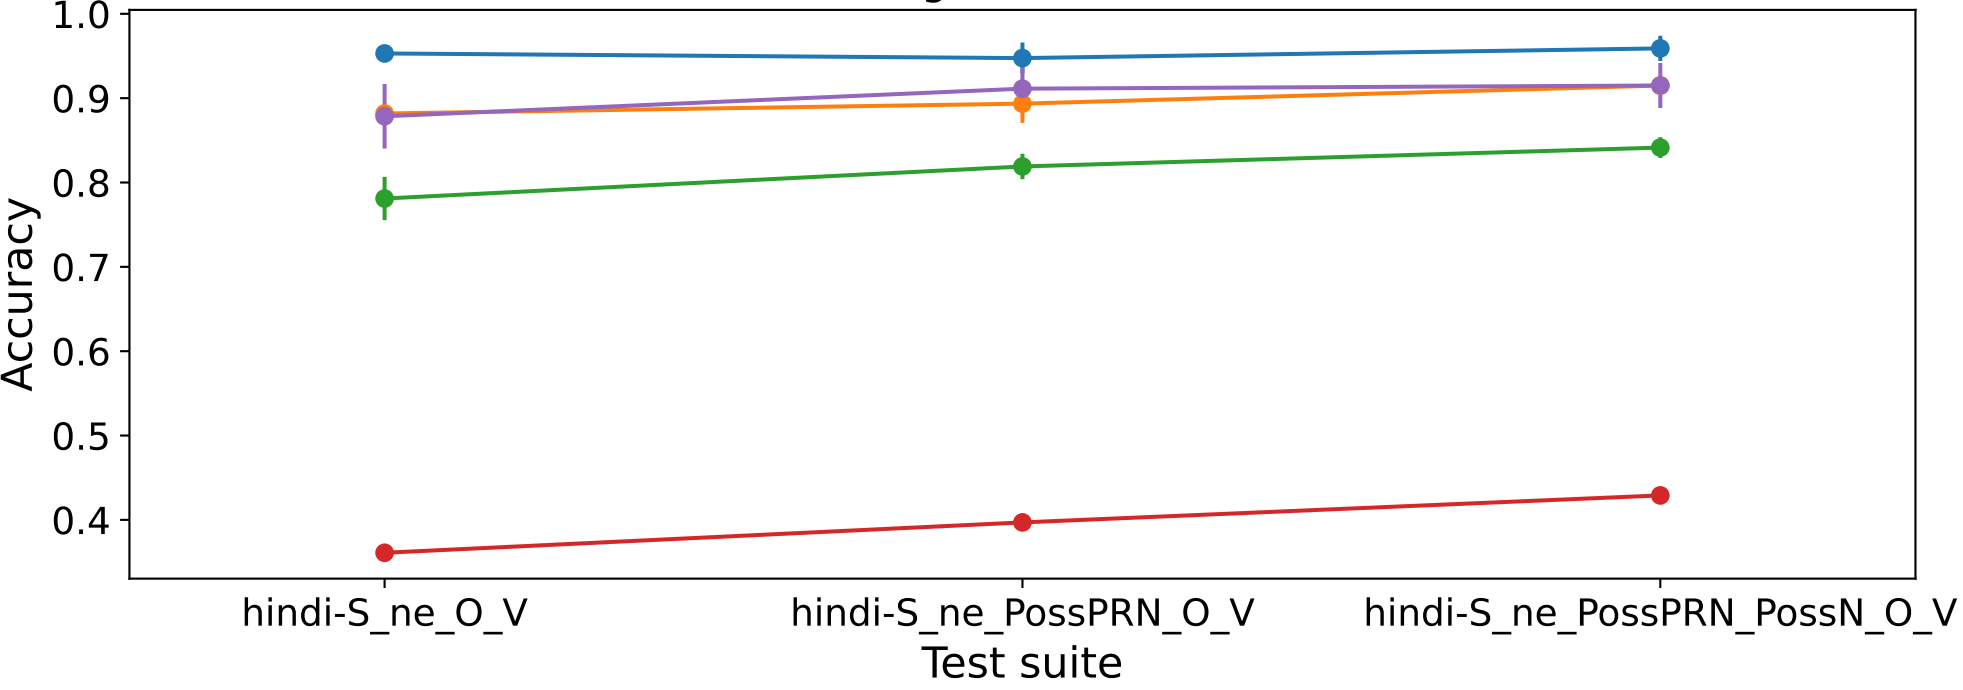

Hindi (nominative-accusative)

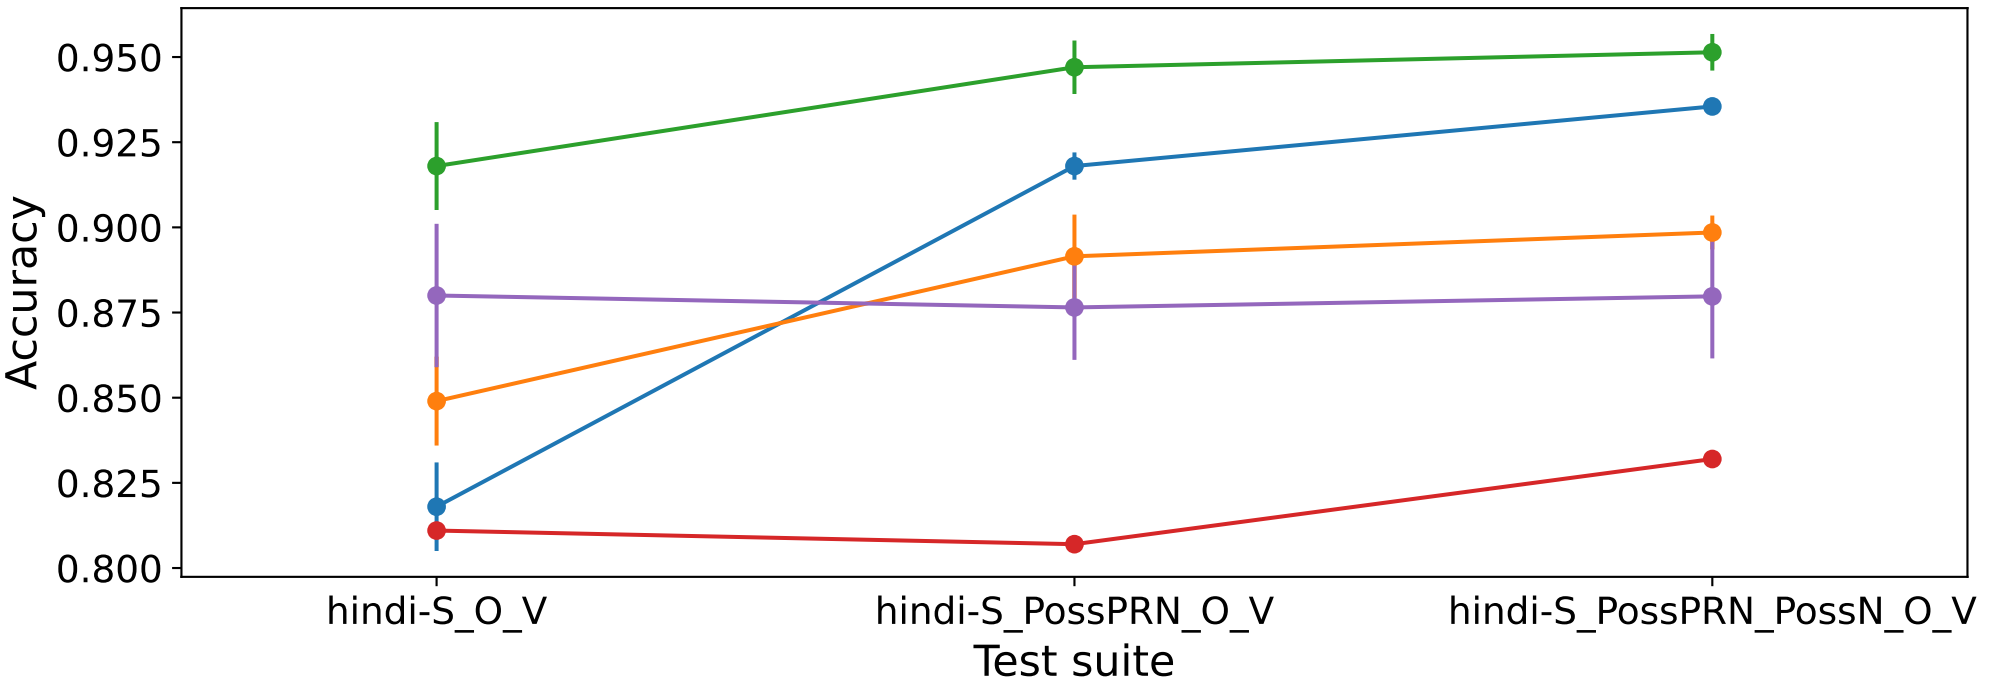

Swahili (verbal predicate)

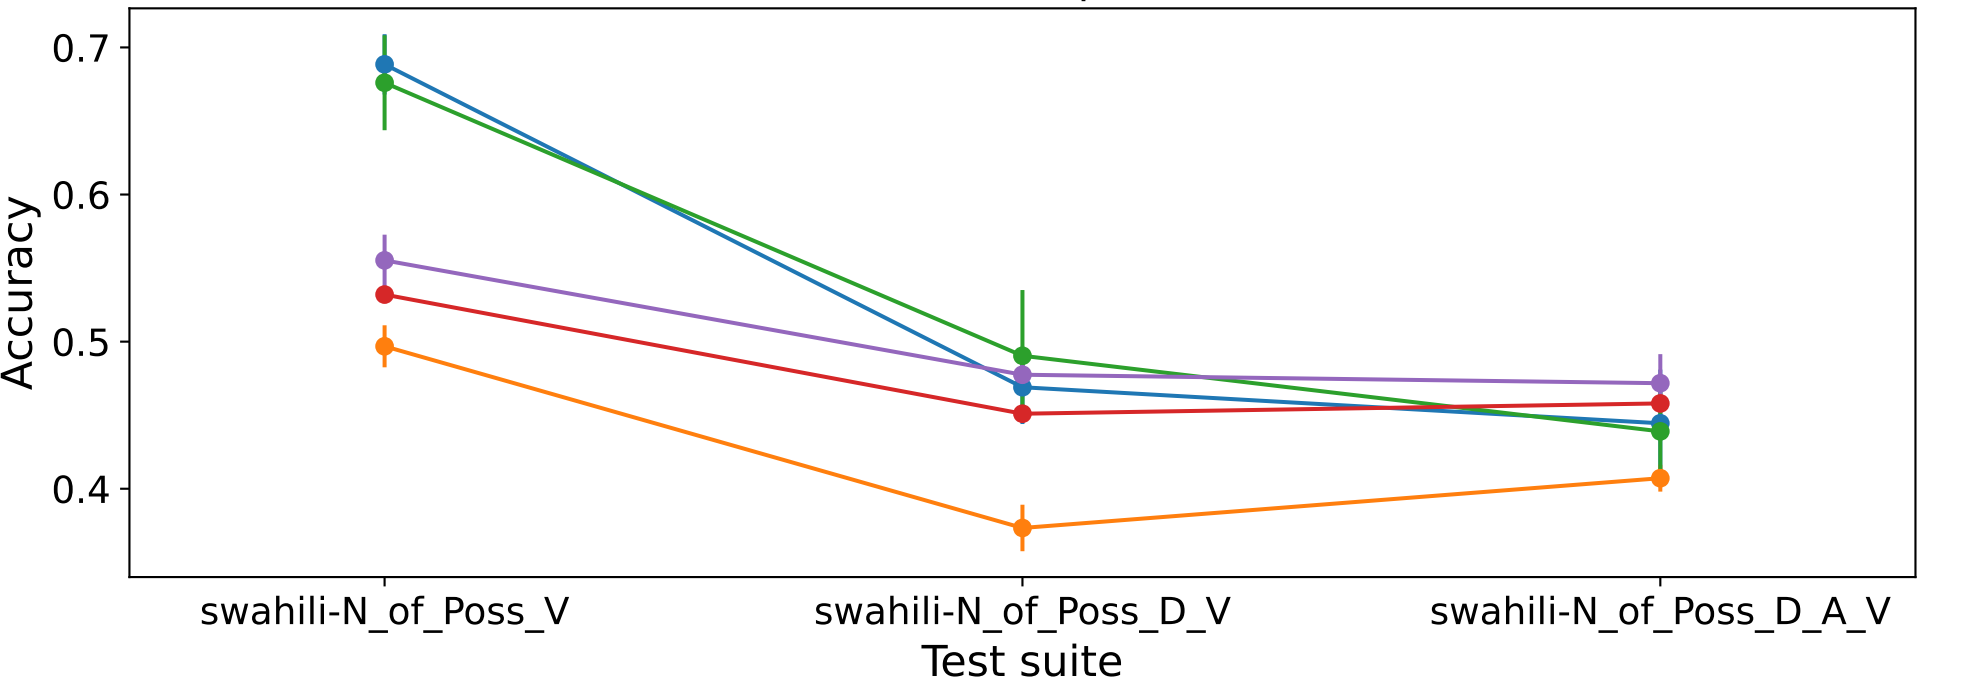

Swahili (adjectival predicate)

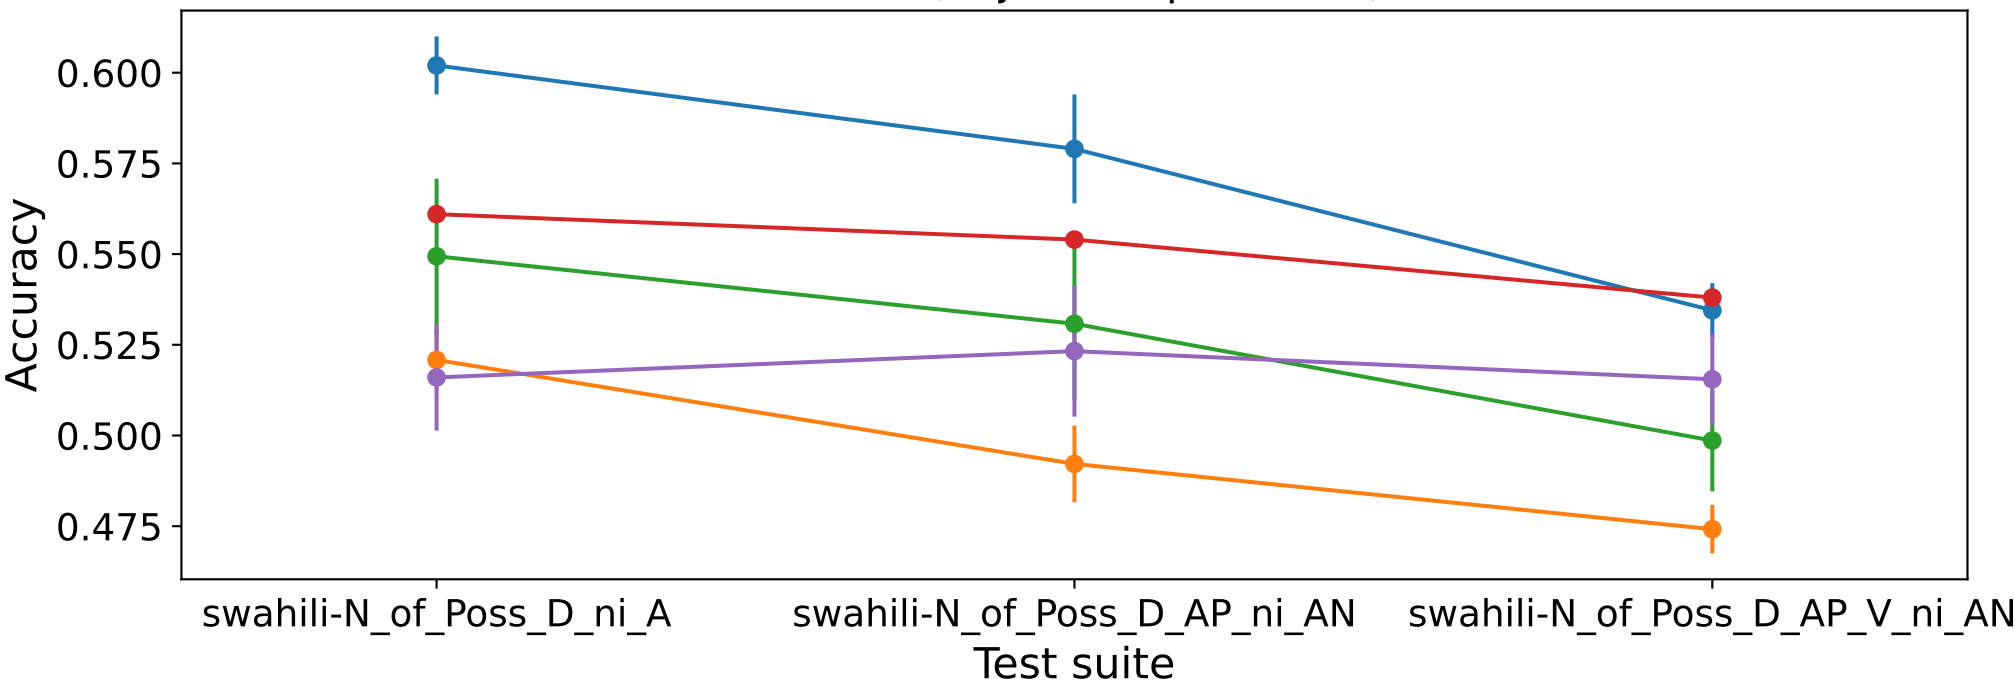

Supplement: OptionalSupplementaryMaterial [file 2025.loreslm-1.30.OptionalSupplementaryMaterial.zip]
