# Supplementary material
Source: ML conference proceedings conference paper supplement (https://aclanthology.org/2025.loreslm-1.30)
Supplement: OptionalSupplementaryMaterial [file 2025.loreslm-1.30.OptionalSupplementaryMaterial.zip]

|        |            | Accuracy               |                        |                        |                        |                        |                        |                        |                        |                        |                        |                        |                        |                        |                        |                        |                        |                        |                        |                        |                        |
|--------|------------|------------------------|------------------------|------------------------|------------------------|------------------------|------------------------|------------------------|------------------------|------------------------|------------------------|------------------------|------------------------|------------------------|------------------------|------------------------|------------------------|------------------------|------------------------|------------------------|------------------------|
|        |            | human                  | 0.996<br>(0.990-0.999) | 0.978<br>(0.967-0.986) | 0.910<br>(0.891-0.927) | 0.973<br>(0.961-0.982) | 0.991<br>(0.983-0.996) | 0.897<br>(0.876-0.915) | 0.750<br>(0.722-0.777) | 0.913<br>(0.894-0.930) | 0.956<br>(0.941-0.968) | 0.966<br>(0.953-0.976) | 0.974<br>(0.962-0.983) | 0.831<br>(0.806-0.854) | 0.914<br>(0.895-0.931) | 0.933<br>(0.916-0.948) | 0.408<br>(0.377-0.439) | 0.564<br>(0.533-0.595) | 0.527<br>(0.496-0.558) | 0.594<br>(0.563-0.625) | 0.444<br>(0.413-0.475) |
| Models | mGPT-1.3B  | 0.991<br>(0.983-0.996) | 0.988<br>(0.979-0.994) | 0.794<br>(0.768-0.819) | 0.994<br>(0.987-0.998) | 0.999<br>(0.994-1.000) | 0.861<br>(0.838-0.882) | 0.916<br>(0.897-0.932) | 0.836<br>(0.812-0.858) | 0.950<br>(0.935-0.963) | 0.929<br>(0.911-0.944) | 0.944<br>(0.928-0.957) | 0.805<br>(0.779-0.829) | 0.922<br>(0.904-0.938) | 0.938<br>(0.921-0.952) | 0.481<br>(0.450-0.512) | 0.594<br>(0.563-0.625) | 0.542<br>(0.511-0.573) | 0.610<br>(0.579-0.640) | 0.494<br>(0.463-0.525) | 0.709<br>(0.680-0.737) |
|        | bloom-560m | 0.868<br>(0.845-0.888) | 0.145<br>(0.124-0.168) | 0.123<br>(0.103-0.145) | 0.531<br>(0.500-0.562) | 0.323<br>(0.294-0.353) | 0.687<br>(0.657-0.716) | 0.519<br>(0.488-0.550) | 0.744<br>(0.716-0.771) | 0.875<br>(0.853-0.895) | 0.783<br>(0.756-0.808) | 0.868<br>(0.845-0.888) | 0.841<br>(0.817-0.863) | 0.855<br>(0.832-0.876) | 0.886<br>(0.865-0.905) | 0.444<br>(0.413-0.475) | 0.482<br>(0.451-0.513) | 0.457<br>(0.426-0.488) | 0.502<br>(0.471-0.533) | 0.378<br>(0.348-0.409) | 0.487<br>(0.456-0.518) |
|        | bloom-1b1  | 0.945<br>(0.929-0.958) | 0.534<br>(0.503-0.565) | 0.093<br>(0.076-0.113) | 0.794<br>(0.768-0.819) | 0.168<br>(0.145-0.193) | 0.692<br>(0.662-0.721) | 0.669<br>(0.639-0.698) | 0.827<br>(0.802-0.850) | 0.882<br>(0.860-0.901) | 0.916<br>(0.897-0.932) | 0.918<br>(0.899-0.934) | 0.818<br>(0.793-0.841) | 0.867<br>(0.844-0.887) | 0.897<br>(0.876-0.915) | 0.410<br>(0.379-0.441) | 0.514<br>(0.483-0.545) | 0.502<br>(0.471-0.533) | 0.527<br>(0.496-0.558) | 0.341<br>(0.312-0.371) | 0.444<br>(0.413-0.475) |
|        | bloom-1b7  | 0.918<br>(0.899-0.934) | 0.644<br>(0.613-0.674) | 0.326<br>(0.297-0.356) | 0.773<br>(0.746-0.799) | 0.656<br>(0.626-0.685) | 0.688<br>(0.658-0.717) | 0.643<br>(0.612-0.673) | 0.712<br>(0.683-0.740) | 0.902<br>(0.882-0.920) | 0.903<br>(0.883-0.921) | 0.924<br>(0.906-0.940) | 0.859<br>(0.836-0.880) | 0.889<br>(0.868-0.908) | 0.898<br>(0.878-0.916) | 0.395<br>(0.365-0.426) | 0.452<br>(0.421-0.483) | 0.468<br>(0.437-0.499) | 0.498<br>(0.467-0.529) | 0.345<br>(0.316-0.375) | 0.494<br>(0.463-0.525) |
|        | bloom-3b   | 0.981<br>(0.970-0.989) | 0.754<br>(0.726-0.780) | 0.452<br>(0.421-0.483) | 0.836<br>(0.812-0.858) | 0.753<br>(0.725-0.779) | 0.853<br>(0.830-0.874) | 0.773<br>(0.746-0.799) | 0.882<br>(0.860-0.901) | 0.858<br>(0.835-0.879) | 0.913<br>(0.894-0.930) | 0.917<br>(0.898-0.933) | 0.829<br>(0.804-0.852) | 0.896<br>(0.875-0.914) | 0.904<br>(0.884-0.922) | 0.378<br>(0.348-0.409) | 0.481<br>(0.450-0.512) | 0.463<br>(0.432-0.494) | 0.539<br>(0.508-0.570) | 0.339<br>(0.310-0.369) | 0.494<br>(0.463-0.525) |
|        | bloom-7b1  | 0.981<br>(0.970-0.989) | 0.920<br>(0.901-0.936) | 0.724<br>(0.695-0.752) | 0.932<br>(0.915-0.947) | 0.928<br>(0.910-0.943) | 0.869<br>(0.846-0.889) | 0.864<br>(0.841-0.885) | 0.801<br>(0.775-0.825) | 0.869<br>(0.846-0.889) | 0.904<br>(0.884-0.922) | 0.921<br>(0.903-0.937) | 0.839<br>(0.815-0.861) | 0.901<br>(0.881-0.919) | 0.887<br>(0.866-0.906) | 0.400<br>(0.369-0.431) | 0.501<br>(0.470-0.532) | 0.471<br>(0.440-0.502) | 0.511<br>(0.480-0.542) | 0.405<br>(0.374-0.436) | 0.510<br>(0.479-0.541) |
|        | bloom      | 0.997<br>(0.991-0.999) | 0.983<br>(0.973-0.990) | 0.914<br>(0.895-0.931) | 0.993<br>(0.986-0.997) | 0.995<br>(0.988-0.998) | 0.923<br>(0.905-0.939) | 0.908<br>(0.888-0.925) | 0.922<br>(0.904-0.938) | 0.905<br>(0.885-0.922) | 0.942<br>(0.926-0.956) | 0.942<br>(0.926-0.956) | 0.908<br>(0.888-0.925) | 0.941<br>(0.925-0.955) | 0.919<br>(0.900-0.935) | 0.416<br>(0.385-0.447) | 0.523<br>(0.492-0.554) | 0.484<br>(0.453-0.515) | 0.548<br>(0.517-0.579) | 0.432<br>(0.401-0.463) | 0.552<br>(0.521-0.583) |
|        | xglm-564M  | 0.932<br>(0.915-0.947) | 0.822<br>(0.797-0.845) | 0.799<br>(0.773-0.823) | 0.757<br>(0.729-0.783) | 0.880<br>(0.858-0.899) | 0.804<br>(0.778-0.828) | 0.506<br>(0.475-0.537) | 0.872<br>(0.850-0.892) | 0.700<br>(0.671-0.728) | 0.781<br>(0.754-0.806) | 0.829<br>(0.804-0.852) | 0.893<br>(0.872-0.911) | 0.930<br>(0.912-0.945) | 0.933<br>(0.916-0.948) | 0.351<br>(0.321-0.381) | 0.469<br>(0.438-0.500) | 0.455<br>(0.424-0.486) | 0.480<br>(0.449-0.511) | 0.364<br>(0.334-0.395) | 0.604<br>(0.573-0.634) |
|        | xglm-1.7B  | 0.955<br>(0.940-0.967) | 0.917<br>(0.898-0.933) | 0.905<br>(0.885-0.922) | 0.903<br>(0.883-0.921) | 0.967<br>(0.954-0.977) | 0.884<br>(0.863-0.903) | 0.654<br>(0.624-0.683) | 0.837<br>(0.813-0.859) | 0.829<br>(0.804-0.852) | 0.852<br>(0.828-0.873) | 0.877<br>(0.855-0.897) | 0.943<br>(0.927-0.957) | 0.961<br>(0.947-0.972) | 0.958<br>(0.944-0.970) | 0.461<br>(0.430-0.492) | 0.531<br>(0.500-0.562) | 0.514<br>(0.483-0.545) | 0.558<br>(0.527-0.589) | 0.547<br>(0.516-0.578) | 0.689<br>(0.659-0.718) |
|        | xglm-2.9B  | 0.977<br>(0.966-0.985) | 0.936<br>(0.919-0.950) | 0.945<br>(0.929-0.958) | 0.858<br>(0.835-0.879) | 0.980<br>(0.969-0.988) | 0.912<br>(0.893-0.929) | 0.823<br>(0.798-0.846) | 0.827<br>(0.802-0.850) | 0.808<br>(0.782-0.832) | 0.848<br>(0.824-0.870) | 0.863<br>(0.840-0.884) | 0.933<br>(0.916-0.948) | 0.962<br>(0.948-0.973) | 0.957<br>(0.943-0.969) | 0.469<br>(0.438-0.500) | 0.566<br>(0.535-0.597) | 0.518<br>(0.487-0.549) | 0.589<br>(0.558-0.620) | 0.522<br>(0.491-0.553) | 0.722<br>(0.693-0.750) |
|        | xglm-4.5B  | 0.607<br>(0.576-0.637) | 0.548<br>(0.517-0.579) | 0.413<br>(0.382-0.444) | 0.285<br>(0.257-0.314) | 0.550<br>(0.519-0.581) | 0.473<br>(0.442-0.504) | 0.517<br>(0.486-0.548) | 0.582<br>(0.551-0.613) | 0.742<br>(0.714-0.769) | 0.786<br>(0.759-0.811) | 0.811<br>(0.785-0.835) | 0.881<br>(0.859-0.900) | 0.926<br>(0.908-0.941) | 0.946<br>(0.930-0.959) | 0.387<br>(0.357-0.418) | 0.502<br>(0.471-0.533) | 0.477<br>(0.446-0.508) | 0.525<br>(0.494-0.556) | 0.412<br>(0.381-0.443) | 0.601<br>(0.570-0.632) |
|        | xglm-7.5B  | 0.966<br>(0.953-0.976) | 0.928<br>(0.910-0.943) | 0.931<br>(0.913-0.946) | 0.932<br>(0.915-0.947) | 0.998<br>(0.993-1.000) | 0.885<br>(0.864-0.904) | 0.796<br>(0.770-0.821) | 0.870<br>(0.848-0.890) | 0.826<br>(0.801-0.849) | 0.828<br>(0.803-0.851) | 0.827<br>(0.802-0.850) | 0.940<br>(0.923-0.954) | 0.956<br>(0.941-0.968) | 0.963<br>(0.949-0.974) | 0.527<br>(0.496-0.558) | 0.586<br>(0.555-0.617) | 0.529<br>(0.498-0.560) | 0.595<br>(0.564-0.626) | 0.607<br>(0.576-0.637) | 0.764<br>(0.736-0.790) |
|        | mbert      | 0.754<br>(0.726-0.780) | 0.662<br>(0.632-0.691) | 0.358<br>(0.328-0.389) | 0.282<br>(0.254-0.311) | 0.497<br>(0.466-0.528) | 0.558<br>(0.527-0.589) | 0.566<br>(0.535-0.597) | 0.766<br>(0.738-0.792) | 0.361<br>(0.331-0.392) | 0.397<br>(0.367-0.428) | 0.429<br>(0.398-0.460) | 0.811<br>(0.785-0.835) | 0.807<br>(0.781-0.831) | 0.832<br>(0.807-0.855) | 0.458<br>(0.427-0.489) | 0.554<br>(0.523-0.585) | 0.538<br>(0.507-0.569) | 0.561<br>(0.530-0.592) | 0.451<br>(0.420-0.482) | 0.532<br>(0.501-0.563) |
|        | xlmr-base  | 0.661<br>(0.631-0.690) | 0.596<br>(0.565-0.627) | 0.597<br>(0.566-0.628) | 0.465<br>(0.434-0.496) | 0.640<br>(0.609-0.670) | 0.659<br>(0.629-0.688) | 0.384<br>(0.354-0.415) | 0.728<br>(0.699-0.755) | 0.764<br>(0.736-0.790) | 0.831<br>(0.806-0.854) | 0.836<br>(0.812-0.858) | 0.864<br>(0.841-0.885) | 0.854<br>(0.831-0.875) | 0.874<br>(0.852-0.894) | 0.488<br>(0.457-0.519) | 0.518<br>(0.487-0.549) | 0.504<br>(0.473-0.535) | 0.513<br>(0.482-0.544) | 0.495<br>(0.464-0.526) | 0.570<br>(0.539-0.601) |
|        | xlmr-large | 0.718<br>(0.689-0.746) | 0.624<br>(0.593-0.654) | 0.648<br>(0.617-0.678) | 0.508<br>(0.477-0.539) | 0.523<br>(0.492-0.554) | 0.672<br>(0.642-0.701) | 0.500<br>(0.469-0.531) | 0.622<br>(0.591-0.652) | 0.919<br>(0.900-0.935) | 0.925<br>(0.907-0.941) | 0.929<br>(0.911-0.944) | 0.831<br>(0.806-0.854) | 0.846<br>(0.822-0.868) | 0.845<br>(0.821-0.867) | 0.414<br>(0.383-0.445) | 0.480<br>(0.449-0.511) | 0.511<br>(0.480-0.542) | 0.492<br>(0.461-0.523) | 0.442<br>(0.411-0.473) | 0.585<br>(0.554-0.616) |
|        | xlmr-xl    | 0.850<br>(0.826-0.872) | 0.656<br>(0.626-0.685) | 0.563<br>(0.532-0.594) | 0.659<br>(0.629-0.688) | 0.669<br>(0.639-0.698) | 0.757<br>(0.729-0.783) | 0.525<br>(0.494-0.556) | 0.777<br>(0.750-0.802) | 0.910<br>(0.891-0.927) | 0.934<br>(0.917-0.949) | 0.946<br>(0.930-0.959) | 0.896<br>(0.875-0.914) | 0.904<br>(0.884-0.922) | 0.869<br>(0.846-0.889) | 0.503<br>(0.472-0.534) | 0.568<br>(0.537-0.599) | 0.552<br>(0.521-0.583) | 0.558<br>(0.527-0.589) | 0.478<br>(0.447-0.509) | 0.561<br>(0.530-0.592) |
|        | xlmr-xxl   | 0.824<br>(0.799-0.847) | 0.743<br>(0.715-0.770) | 0.655<br>(0.625-0.684) | 0.647<br>(0.616-0.677) | 0.647<br>(0.616-0.677) | 0.720<br>(0.691-0.748) | 0.691<br>(0.661-0.720) | 0.687<br>(0.657-0.716) | 0.921<br>(0.903-0.937) | 0.955<br>(0.940-0.967) | 0.949<br>(0.933-0.962) | 0.929<br>(0.911-0.944) | 0.902<br>(0.882-0.920) | 0.931<br>(0.913-0.946) | 0.482<br>(0.451-0.513) | 0.527<br>(0.496-0.558) | 0.495<br>(0.464-0.526) | 0.501<br>(0.470-0.532) | 0.495<br>(0.464-0.526) | 0.505<br>(0.474-0.536) |
|        |            |                        |                        |                        |                        |                        |                        |                        |                        |                        |                        |                        |                        |                        |                        |                        |                        |                        |                        |                        |                        |
