# Supplementary material
Source: ML conference proceedings conference paper supplement (https://aclanthology.org/2025.loreslm-1.30)

Accuracy versus number of parameters

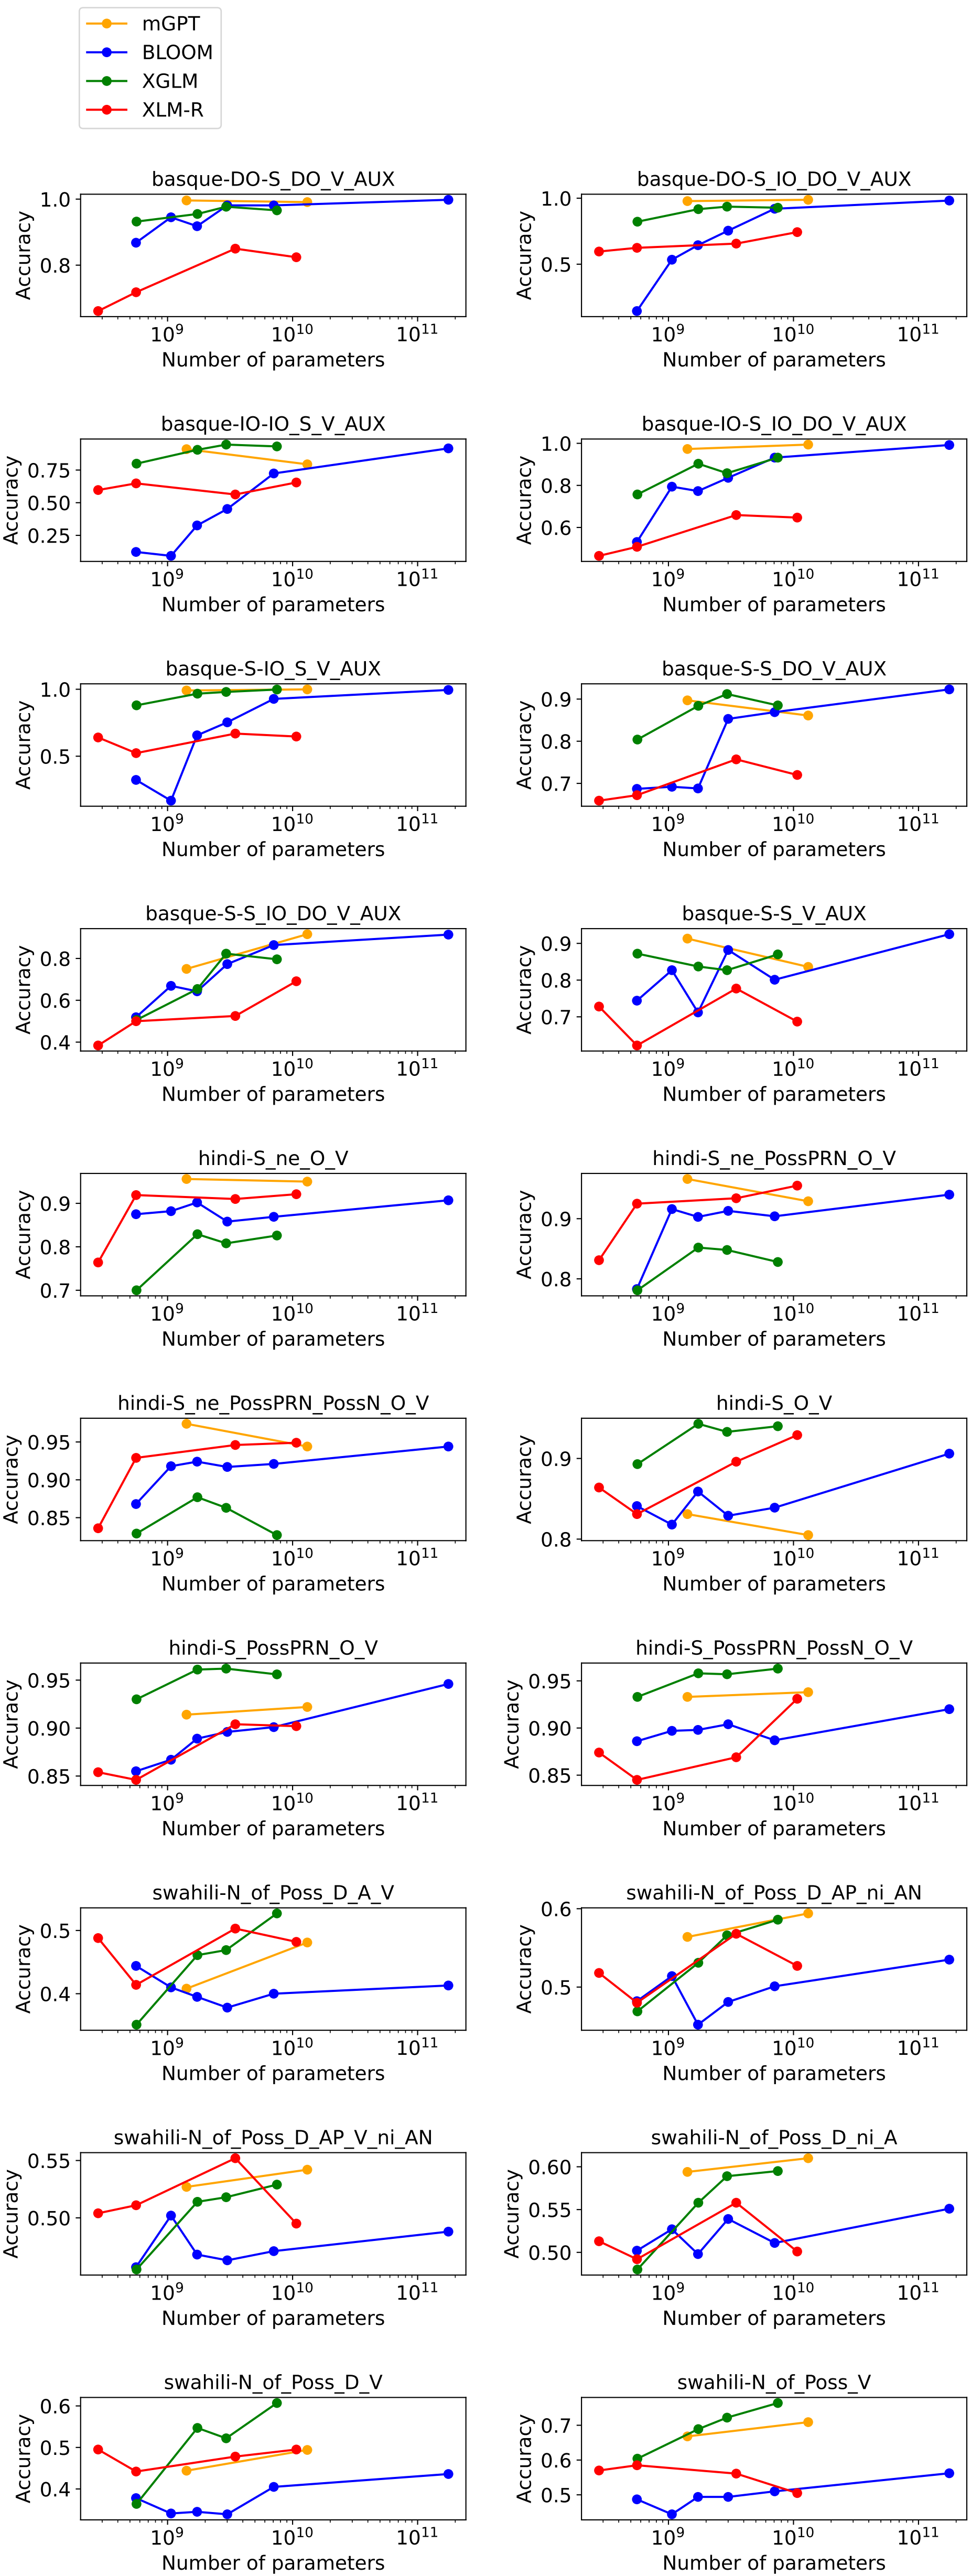

Supplement: OptionalSupplementaryMaterial [file 2025.loreslm-1.30.OptionalSupplementaryMaterial.zip]

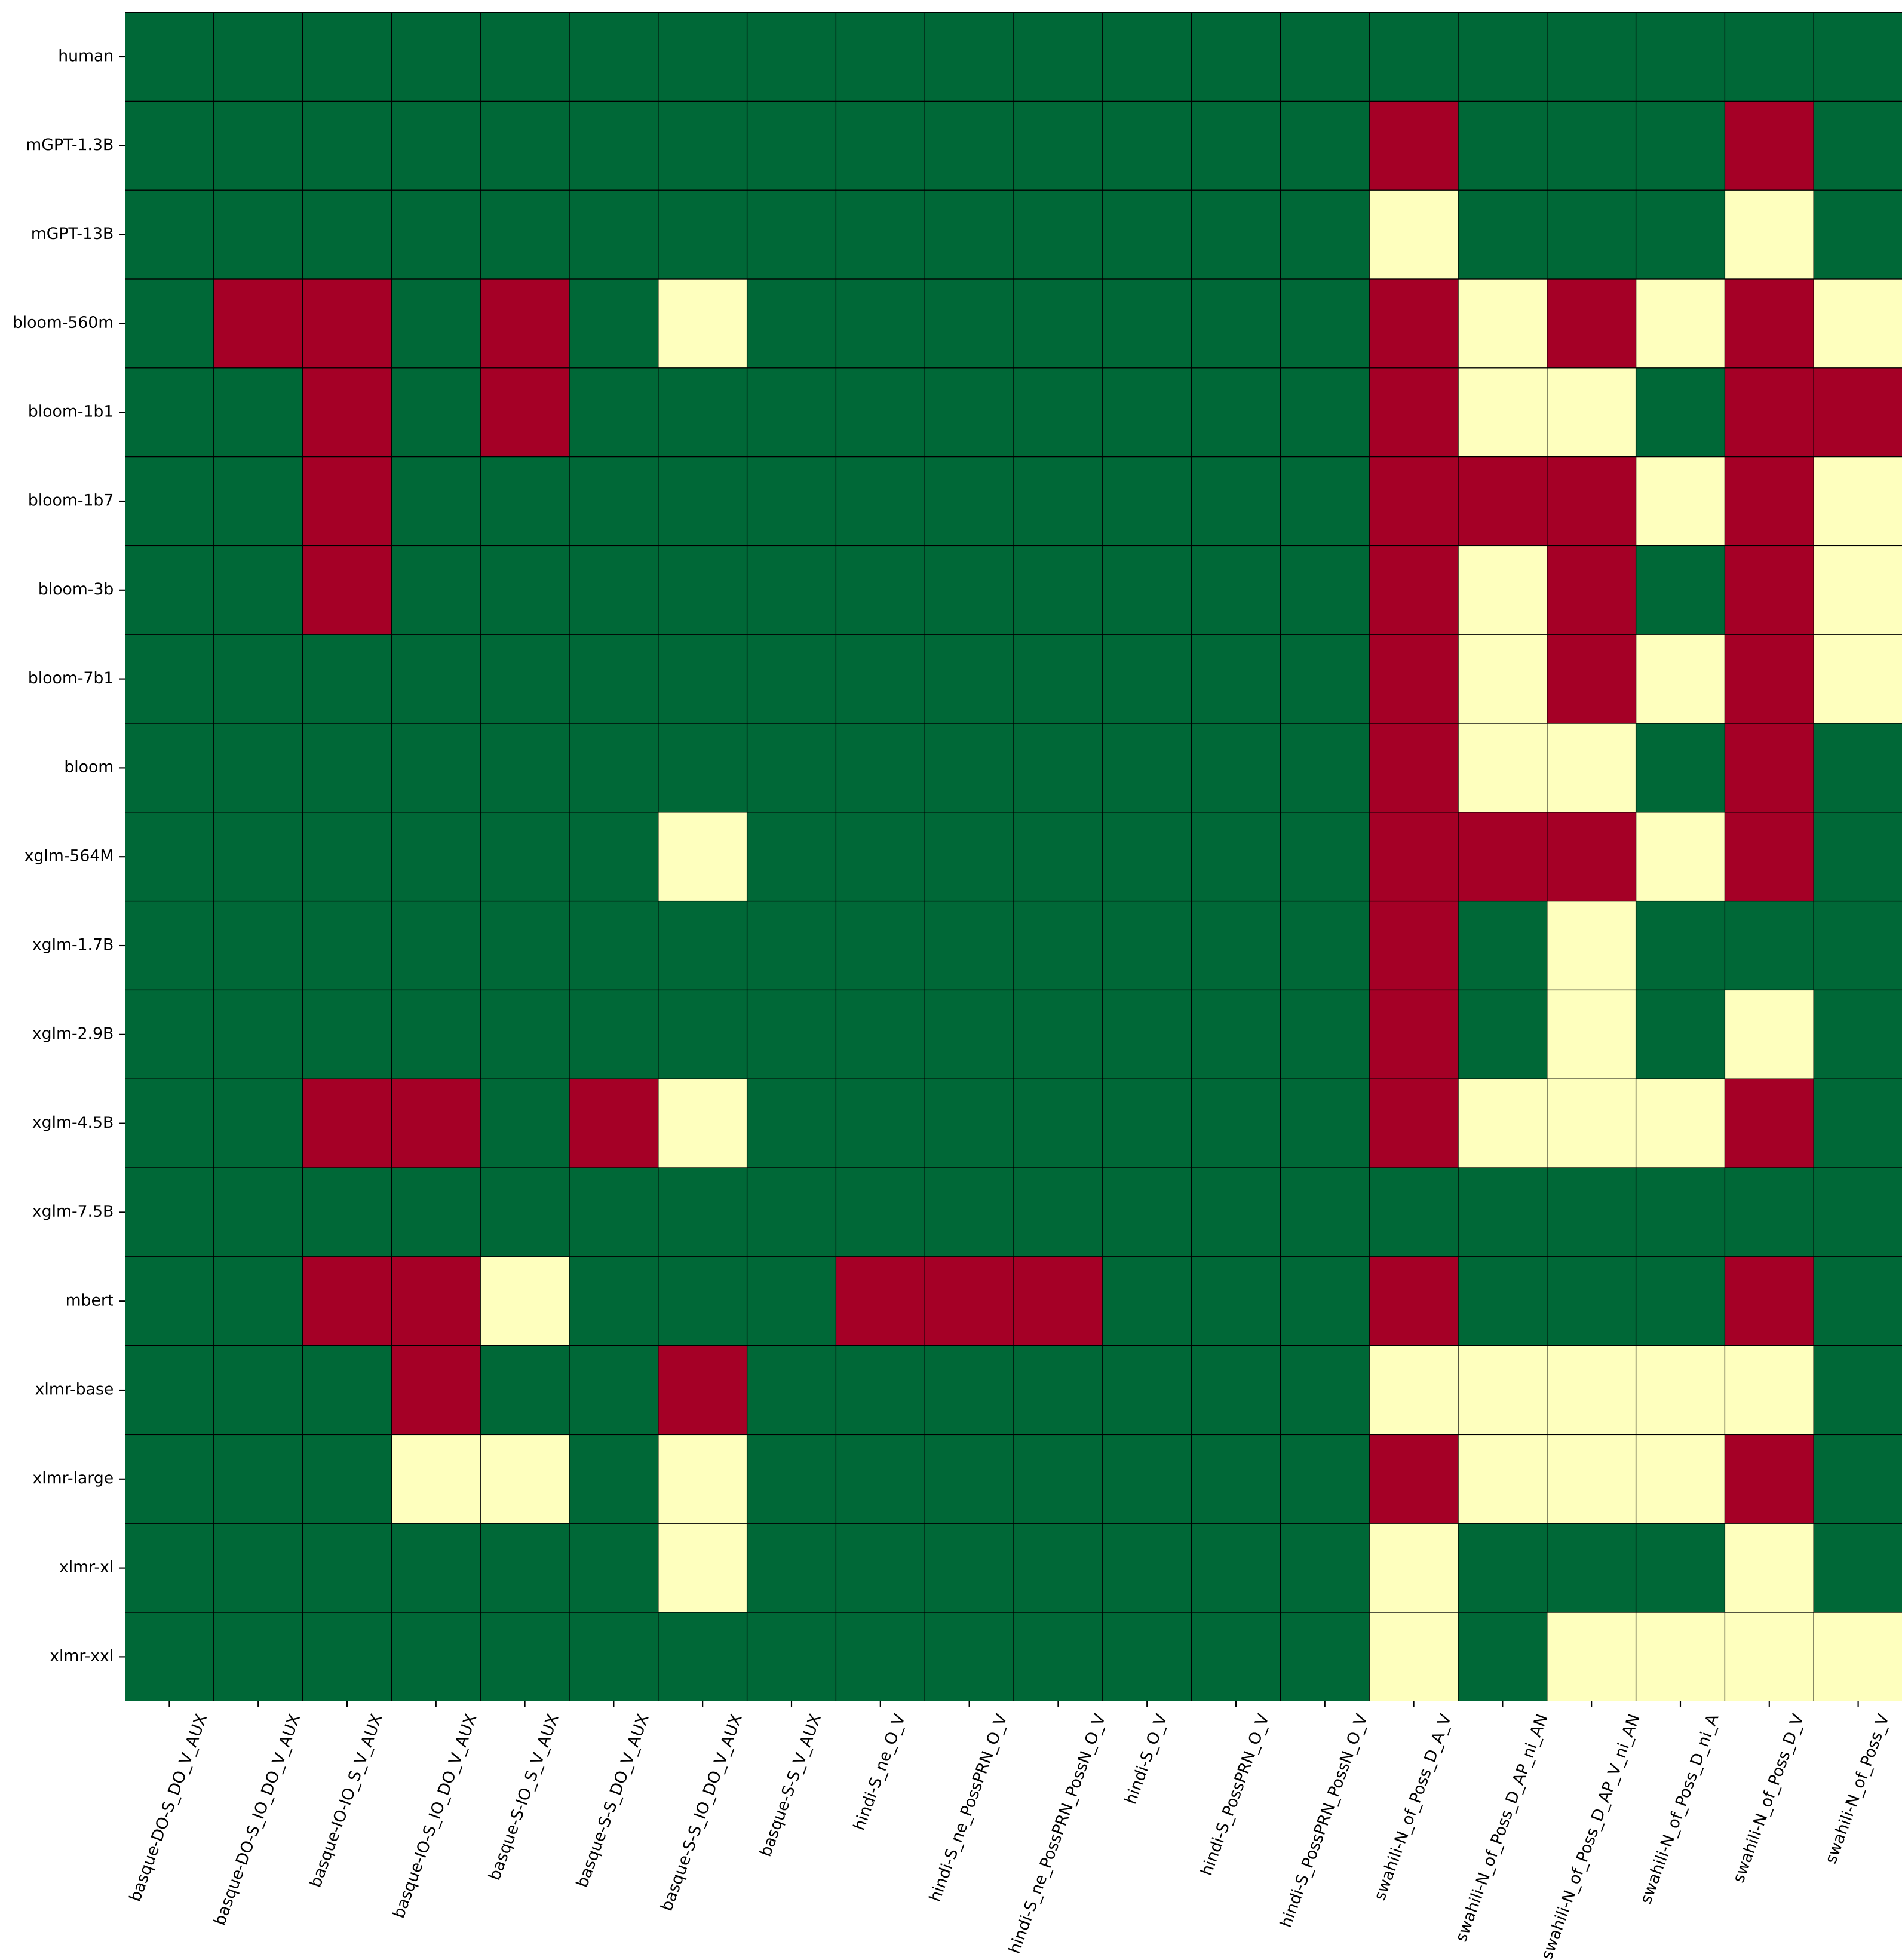

Supplement: OptionalSupplementaryMaterial [file 2025.loreslm-1.30.OptionalSupplementaryMaterial.zip]
